# Supplementary material
Source: PubMed Central journal article supplement (PMC7237070)
Supplement: NIHMS1549536-supplement-Supplemental_Digital_Content.pdf [file NIHMS1549536-supplement-Supplemental_Digital_Content.pdf]

**Supplemental Table 1: Multivariable Models of Obesity and Reactive Airway Disease in Adolescents and Young Adults**

| Parameter                                            | Obesity<br>(n = 90) |              | Reactive Airway Disease<br>(n = 88) |             |
|------------------------------------------------------|---------------------|--------------|-------------------------------------|-------------|
|                                                      | OR (95% CI)         | P-value      | OR (95% CI)                         | P-value     |
| HEU                                                  | 4.6 (1.4, 17.0)     | <b>0.01</b>  | 4.0 (1.2, 15.0)                     | <b>0.03</b> |
| Age (per year)                                       | 1.3 (1.1, 1.5)      | <b>0.01</b>  | 1.1 (0.9, 1.4)                      | 0.32        |
| Male                                                 | 0.7 (0.2, 1.8)      | 0.42         | 1.4 (0.4, 4.7)                      | 0.56        |
| Median income (per \$10,000) <sup>a</sup>            | 0.9 (0.7, 1.1)      | 0.27         | 0.7 (0.5, 1.0)                      | <b>0.02</b> |
| Maternal BMI (per 2 kg/m <sup>2</sup> ) <sup>b</sup> | 1.3 (1.1, 1.5)      | <b>0.003</b> | 1.1 (0.9, 1.3)                      | 0.29        |
| Maternal history of tobacco use                      | 0.7 (0.2, 2.3)      | 0.61         | 0.7 (0.2, 2.4)                      | 0.58        |
| Cesarean section                                     | 1.4 (0.4, 4.7)      | 0.54         | 2.2 (0.7, 7.3)                      | 0.21        |
| Adolescent obesity                                   | -                   | -            | 0.6 (0.2, 2.1)                      | 0.45        |

Bold text denotes statistical significance with  $P < 0.05$ .

<sup>a</sup> Median household income was determined based on current adolescent zip code according to U.S. census data.

<sup>b</sup> Maternal BMI was ascertained between 35 and 50 years of age.

**Supplemental Table 2: Characteristics of Mother-Adolescent Dyads with Complete Data for Multivariable Models**

**A) Adolescents and Young Adults**

|                                    | <b>HEU Adolescents</b><br>(n = 32) | <b>Controls</b><br>(n = 56) | <b>P-value</b> |
|------------------------------------|------------------------------------|-----------------------------|----------------|
| <b>Demographic Characteristics</b> |                                    |                             |                |
| Age, years                         | 17 ± 3                             | 18 ± 3                      | 0.09           |
| Male, %                            | 53                                 | 48                          | 0.66           |
| Race/Ethnicity, %                  |                                    |                             | 0.72           |
| White                              | 19                                 | 21                          |                |
| Black                              | 41                                 | 39                          |                |
| Asian                              | 0                                  | 4                           |                |
| Hispanic                           | 41                                 | 36                          |                |
| Median household income, \$        | 57,143 [51,875, 83,843]            | 57,143 [51,875, 91,250]     | 0.67           |
| <b>Behavioral Health</b>           |                                    |                             |                |
| Ever tobacco use, %                | 7                                  | 13                          | 0.39           |
| <b>Birth History</b>               |                                    |                             |                |
| Birth weight, kg                   | 3.1 ± 0.6                          | 3.1 ± 0.6                   | 0.92           |
| Full term, %                       | 80                                 | 86                          | 0.48           |
| C-section, %                       | 44                                 | 20                          | <b>0.02</b>    |

**B) Mothers of Adolescents and Young Adults**

|                                                    | <b>Mothers of HEU Adolescents</b><br>(n = 32) | <b>Mothers of Controls</b><br>(n = 56) | <b>P-value</b> |
|----------------------------------------------------|-----------------------------------------------|----------------------------------------|----------------|
| <b>General Prenatal History</b>                    |                                               |                                        |                |
| Age at delivery, years                             | 29 ± 4                                        | 27 ± 7                                 | 0.29           |
| Earliest BMI during pregnancy, kg/m <sup>2</sup>   | 27.4 ± 4.8                                    | 27.0 ± 4.9                             | 0.81           |
| Obesity during pregnancy, %                        | 27                                            | 30                                     | 0.79           |
| Diabetes during pregnancy, %                       | 0                                             | 5                                      | 0.22           |
| Preeclampsia, %                                    | 0                                             | 5                                      | 0.21           |
| <b>HIV-Specific Prenatal History</b>               |                                               |                                        |                |
| Duration of HIV, years                             | 4 [2, 7]                                      |                                        |                |
| CD4 count, third trimester, cells/mm <sup>3</sup>  | 402 [227, 599]                                |                                        |                |
| HIV viral load < 400 copies/mL, third trimester, % | 73                                            |                                        |                |
| ART during pregnancy, %                            | 97                                            |                                        |                |
| NRTI                                               | 97                                            |                                        |                |
| NNRTI                                              | 23                                            |                                        |                |
| PI                                                 | 53                                            |                                        |                |
| <b>Contemporary Maternal Characteristics</b>       |                                               |                                        |                |
| Education, %                                       |                                               |                                        | 0.74           |
| Less than high school degree                       | 19                                            | 27                                     |                |
| High school degree                                 | 52                                            | 45                                     |                |
| College degree                                     | 29                                            | 29                                     |                |
| BMI, 35-50 years old, kg/m <sup>2</sup>            | 27.8 ± 7.0                                    | 31.6 ± 7.4                             | <b>0.02</b>    |
| BMI category, 35-50 years old, %                   |                                               |                                        | 0.06           |
| Underweight                                        | 0                                             | 0                                      |                |
| Normal weight                                      | 41                                            | 25                                     |                |
| Overweight                                         | 28                                            | 18                                     |                |
| Obese                                              | 31                                            | 57                                     |                |
| Ever tobacco use, %                                | 41                                            | 23                                     | 0.09           |

Variables that are normally distributed are expressed as mean ± SD, whereas variables that are not normally distributed are expressed as median [IQR]. Bold text denotes statistical significance with  $P < 0.05$ .

Abbreviations: C-section, Cesarean section; NNRTI, non-nucleoside reverse transcriptase inhibitor; NRTI, nucleoside reverse transcriptase inhibitor; PI, protease inhibitor.
